# Supplementary material for: Body Mass Index and Postacute Sequelae of SARS-CoV-2 Infection in Children and Young Adults
Source: PubMed Central journal article supplement (PMC11581483; doi:10.1001/jamanetworkopen.2024.41970), 2024-10-28
Supplement: jamanetwopen-e2441970-s001.pdf [file jamanetwopen-e2441970-s001.pdf]

## Supplemental Online Content

Zhou T, Zhang B, Zhang D, et al. Body mass index and postacute sequelae of SARS-CoV-2 infection in children and young adults. *JAMA Netw. Open.* 2024;7(10):e2441970. doi:10.1001/jamanetworkopen.2024.41970

**eTable 1.** The 26 Sites That Contributed Data in the Analysis

**eMethods.** Data Description

**eTable 2.** Details for the Medical Conditions in the Exclusion Criteria

**eFigure.** The Participants Selection Process

**eAppendix.** Statistical Methods Description

**eTable 3.** Characteristics According to Missingness of BMI Status Prior to COVID-19 Infection

**eTable 4.** Incident Occurrences of PASC Symptoms and Conditions Within Follow-Up Period

**eTable 5.** Estimated Association of BMI Status Prior to the SARS-CoV-2 Infection and Risk of PASC by Considering the Assessment Time of BMI Status (N=105326)

**eTable 6.** Estimated Association of BMI Status Prior to the SARS-CoV-2 Infection and Risk of PASC by Considering the Release Time of U09.9 (N=101143)

**eTable 7.** Estimated Association of BMI Status Prior to the SARS-CoV-2 Infection and Risk of PASC by Excluding Participants Who Were Included With the Diagnosis of PASC Alone Considering the Release Time of U09.9 (N=100509)

**eTable 8.** Estimated Association of BMI Status Prior to the SARS-CoV-2 Infection and Risk of PASC After Excluding Participants Confirmed by Serology Test After November 2022 (N=171978)

**eTable 9.** Estimated Association of BMI Status Prior to the SARS-CoV-2 Infection and Risk of PASC After Excluding Severe or Moderate Participants (N=163094)

**eTable 10.** Estimated Association of BMI Status Prior to the SARS-CoV-2 Infection and Risk of PASC Adjusting for Doses of COVID-19 Vaccine Before Infection (N=172316)

**eTable 11.** Estimated Association of BMI Status Prior to the SARS-CoV-2 Infection and Risk of PASC Adjusting for Interval Since Last COVID-19 Vaccination Date (N=172316)

**eTable 12.** Estimated Association of BMI Status Prior to the SARS-CoV-2 Infection and Risk of PASC Adjusting for Doses of COVID-19 Vaccine Before Infection and Interval Since Last COVID-19 Vaccination Date (N=172316)

**eTable 13.** Estimated Association of BMI Status Prior to the SARS-CoV-2 Infection and Risk of PASC Adjusting Type of Insurance<sup>1</sup> (N=140036)

**eTable 14.** Estimated Association of BMI Status Prior to the SARS-CoV-2 Infection and Risk of PASC Accounting for the Clustering by Sites (N=172136)

**eTable 15.** Estimated Association of BMI Status Prior to the SARS-CoV-2 Infection and Risk of PASC After Excluding Participants With Diabetes (N=169495)

**eTable 16.** Estimated Association of BMI Status Prior to the SARS-CoV-2 Infection and Risk of PASC After Excluding Obese Participants Taking Weight Loss Drugs (N=169255)

**eTable 17.** Estimated Association of BMI Status Prior to the SARS-CoV-2 Infection and Risk of PASC Based on Primary Care Sites (N=42470)

**eTable 18.** Estimated Association of BMI Status Prior to the SARS-CoV-2 Infection and Risk of Foreign Body in Ear as a Negative Control Outcome (N=172316)

**eTable 19.** Negative Control Outcomes

**eReferences.**

This supplemental material has been provided by the authors to give readers additional information about their work.

**eTable 1.** The 26 Sites That Contributed Data in the Analysis

| <b>ID</b> | <b>Site Name</b>                                     | <b>City, State</b>               |
|-----------|------------------------------------------------------|----------------------------------|
| 1         | Albert Einstein College of Medicine                  | Bronx, New York                  |
| 2         | Ann & Robert H. Lurie Children's Hospital of Chicago | Chicago, Illinois                |
| 3         | Cincinnati Children's Hospital Medical Center        | Cincinnati, Ohio                 |
| 4         | Children's Hospital of Philadelphia                  | Philadelphia, Pennsylvania       |
| 5         | Children's National Hospital                         | Washington, District of Columbia |
| 6         | Colorado Children's Hospital                         | Aurora, Colorado                 |
| 7         | Duke University Health System                        | Durham, North Carolina           |
| 8         | Medical College of Wisconsin                         | Milwaukee, Wisconsin             |
| 9         | Medical University of South Carolina                 | Charleston, South Carolina       |
| 10        | Nationwide Children's Hospital                       | Columbus, Ohio                   |
| 11        | Nemours Children's Hospital                          | Orlando, Florida                 |
| 12        | New York University Langone Health                   | New York, New York               |
| 13        | Northwestern University                              | Evanston, Illinois               |
| 14        | OCHIN, Inc                                           | Portland, Oregon                 |
| 15        | Seattle Children's Hospital                          | Seattle, Washington              |
| 16        | Stanford Children's Health                           | Stanford, California             |
| 17        | The Ohio State University                            | Columbus, Ohio                   |
| 18        | University of California, San Francisco              | San Francisco, California        |
| 19        | University of Iowa Healthcare                        | Iowa City, Iowa                  |
| 20        | University of Michigan                               | Ann Arbor, Michigan              |
| 21        | University of Missouri                               | Columbia, Missouri               |
| 22        | University of Nebraska Medical Center                | Omaha, NE                        |
| 23        | UPMC-Children's Hospital of Pittsburgh               | Pittsburgh, Pennsylvania         |
| 24        | Vanderbilt University Medical Center                 | Nashville, Tennessee             |
| 25        | Wake Forest University Health Sciences               | Winston-Salem, NC                |
| 26        | Weill Cornell Medicine                               | New York, New York               |

## eMethods. Data Description

### A. Description of electronic health records (EHR) data

The real-world data utilized in our analysis is derived from electronic health records (EHRs), covering a wide range of healthcare interaction information routinely collected and stored by hospitals. This includes clinical data such as diagnoses and treatments, laboratory and test results, and administrative data including patient demographics and billing information [1]. The hospital-based EHR data from the Researching COVID to Enhance Recovery (RECOVER) Initiative COVID-19 Database served as the basis for defining and determining exposure, outcomes, and covariates. Unlike General Practitioner (GP) data, self-reported data, or external data sources, our study used the structured, standardized EHR entries made by healthcare providers within hospital settings [2]. EHR data provides a more detailed and integrated view of a patient's health status, medical history, and healthcare interactions across various providers and settings [3].

### B. RECOVER population and generalizability

The National Institutes of Health (NIH) launched the new RECOVER initiative in 2021 to leverage electronic health record (EHR) data to better identify and characterize patients with post-acute sequelae of SARS-CoV-2 infection (PASC). RECOVER obtains EHRs from three large national healthcare networks within the United States, covering regional catchment areas across 41 states [4]. These networks collectively hold the EHRs of over 60 million patients, including records from more than 7 million individuals who have been affected by COVID-19 [5]. RECOVER collaborates with the National Institutes of Health's (NIH) All of Us Research Program, which contributes additional health records to this vast database [6]. Together, these sources comprise one of the world's largest collections of EHRs.

In our study, participating institutions included: Albert Einstein College of Medicine, Ann & Robert H. Lurie Children's Hospital of Chicago, Cincinnati Children's Hospital Medical Center, Children's Hospital of Philadelphia, Children's National Hospital, Colorado Children's Hospital, Duke University Health System, Medical College of Wisconsin, Medical University of South Carolina, Nationwide Children's Hospital, Nemours Children's Health System, New York University Langone Health, Northwestern University, OCHIN, Inc., Seattle Children's Hospital, Stanford Children's Health, The Ohio State University, University of California, San Francisco, University of Iowa Healthcare, University of Michigan, University of Missouri, University of Nebraska Medical Center, UPMC-Children's Hospital of Pittsburgh, Vanderbilt University Medical Center, Wake Forest University Health Sciences, Weill Cornell Medicine. For this study, we used the s9 version of the data, collected till May 2023.

### C. Cohort definition and observation windows

We identified the study cohort by selecting:

- Children and adolescents aged under 21 years at the start of the study period, aligning with the American Academy of Pediatrics' definition of the pediatric population [7].
- Participants with no genetic syndromes associated with obesity or any conditions signaling a need for weight gain or a medical cause of altered weight tendencies during the baseline period.
- Participants aged above 5 at the time of assessing BMI due to their potential for more dramatic BMI variations during the baseline period.
- Users of the healthcare systems, defined as having at least one primary care visit during both baseline and follow-up periods (either in-person, via phone, or through telehealth).

To guarantee a comprehensive follow-up for all participants, we mandated that entry into the cohort—applicable to both the intervention and control groups—be timed no later than 179 days prior to the conclusion of the study period. This stipulation was critical to secure a full 179-day follow-up duration for each participant, thereby upholding the integrity of the follow-up data.

**eTable 2.** Details for the Medical Conditions in the Exclusion Criteria

| <b>Condition</b>                                                                            | <b>Condition Name</b>                                                                                                                                                                                                                                                                                                                                                                                                                          |
|---------------------------------------------------------------------------------------------|------------------------------------------------------------------------------------------------------------------------------------------------------------------------------------------------------------------------------------------------------------------------------------------------------------------------------------------------------------------------------------------------------------------------------------------------|
| Genetic syndromes associated with obesity                                                   | MC4R deficiency, Leptin deficiency, Leptin receptor deficiency, POMC deficiency, Proprotein subtilisin or kexin type 1 deficiency, SRC1 deficiency, Prader-Willi syndrome, Alstrom syndrome, Bardet-Biedl syndrome, Smith-Magenis syndrome, SH2B1 deficiency, Sim1 deficiency, 16p11.2 microdeletion syndrome, Brain derived neurotrophic factor deficiency, Albright's hereditary osteodystrophy, Cohen syndrome, Beckwith-Wiedemann syndrome |
| Conditions signaling a need for weight gain or a medical cause of altered weight tendencies | Bariatric surgery, BMI less than 5 <sup>th</sup> percentile for age and sex, cancer, Crohn's disease, Cushing syndrome, cystic fibrosis, eating disorder, growth hormone deficiency, HIV/AIDS, panhypopituitarism, pregnancy, sickle cell disease, ulcerative colitis                                                                                                                                                                          |

**eFigure.** The Participants Selection Process

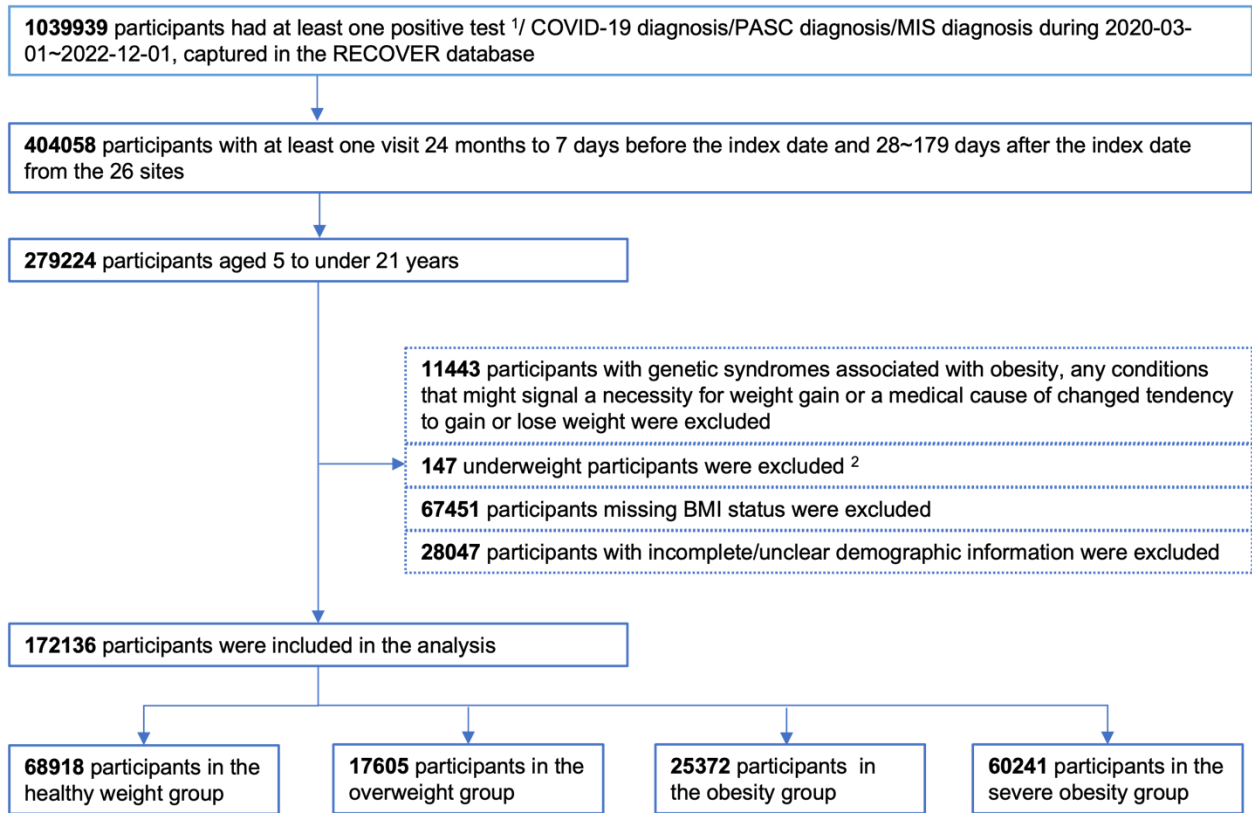

<sup>1</sup> Including PCR, antigen, and serology tests

<sup>2</sup> BMI status was assessed within 18 months before the index date, the measure closest to the index date was selected.

## eAppendix. Statistical Methods Description

### A. Modified Poisson Regression

Modified Poisson Regression is a statistical method used to estimate relative risks (RR) or risk ratios for binary outcomes, especially in cohort studies or clinical trials [8]. Unlike logistic regression, which estimates odds ratios, modified Poisson regression directly estimates relative risks, which are often more interpretable in epidemiological studies where the event of interest is not rare.

Modified Poisson regression uses a sandwich estimator (also known as the Huber-White estimator) to provide robust standard errors. This adjustment accounts for the misspecification of the Poisson model for binary data and ensures correct inference [9]. It was introduced as an alternative to logistic regression when the outcome is common (incidence >10%), as odds ratios (OR) from logistic regression can overestimate the relative risk in these situations [10]. Modified Poisson regression often converges when log-binomial models (another method for estimating relative risks) fail to do so, especially with continuous covariates or multiple categorical predictors [11]. It can accommodate various types of independent variables (continuous, categorical) and can be extended to include interaction terms and random effects [12].

The model takes the form:

$$\log(\pi) = \beta_0 + \beta_1 X_1 + \beta_2 X_2 + \dots + \beta_k X_k$$

Where  $\pi$  is the probability of the outcome,  $\beta_0$  is the intercept, and  $\beta_1$  to  $\beta_k$  are the regression coefficients for predictors  $X_1$  to  $X_k$ .

The relative risk for a binary predictor is then estimated as:

$$RR = \exp(\beta)$$

In summary, modified Poisson regression It avoids the issues related to ORs being interpreted as RRs when the outcome is common. It is particularly useful when the sample size is large and when the probability of the event is high.

### B. Trend Analysis

The trend test we used in the study is Orthogonal Trend Analysis, also known as Orthogonal Polynomial Trend Analysis or Orthogonal Polynomial Contrasts. It is a statistical method used in the analysis of variance (ANOVA) to analyze trends in data across ordered levels of a factor. This method is particularly useful in experimental designs where treatments have a natural order, such as time series, dose-response studies, or developmental stages. [13]

This approach decomposes the total variation in the data into independent (orthogonal) components, typically representing linear, quadratic, cubic, and higher-order trends. Each component is orthogonal, meaning that the components are uncorrelated and do not overlap, allowing for clear interpretation of the trends [14]. By focusing on specific trend components, this method can be more powerful in detecting patterns than omnibus F-tests, especially when the underlying trend matches one of the orthogonal components. Each trend component has a clear interpretation in terms of the shape of the relationship between the factor levels and the response variable. It can be applied to factors with equal or unequal intervals between levels, though the coefficients for the trend components differ in these cases.

Implementation:

- Define Orthogonal Polynomials: For each trend component (linear, quadratic, etc.), a set of coefficients is defined that creates an orthogonal contrast across the factor levels.
- Calculate Contrast Sums of Squares: Using these coefficients, contrast sums of squares are calculated for each trend component.

- **Test Significance:** The significance of each trend component is tested using F-tests or t-tests, depending on the experimental design.
- **Interpret Results:** Significant trend components indicate the presence of specific patterns in the data (e.g., a significant linear trend suggests a straight-line relationship).

In summary, this technique is particularly useful in experimental and observational studies where the objective is to understand how a response variable changes systematically across levels of an independent variable. Specifically, orthogonal trend analysis provides a clear interpretation of different types of trends (e.g., linear vs. quadratic) without the confounding effects of correlations between trend components. By using orthogonal contrasts, this method allows the extraction of maximum information from the data with minimal redundancy.

This technique is particularly useful in experimental and observational studies where the objective is to understand how a response variable changes systematically across levels of an independent variable. For example, in dose-response studies, orthogonal trend analysis helps in determining whether the response follows a linear, quadratic, or higher-order trend with increasing doses. In our study, orthogonal trend analysis helps to determine whether the response follows a linear dose-response trend with increasing BMI status (i.e., healthy weight, overweight, obesity, and severe obesity) in terms of the PASC outcomes.

### C. Negative control experiments

To evaluate the robustness of our pipeline, we selected from a list of 40 negative control outcomes to conduct the negative control experiments, but only one, i.e., foreign body in ear was employed. In this investigation, negative control outcomes are defined as clinical outcomes believed to have no causal relationship to the exposure. The full list of outcomes for our research was designated by pediatric physicians. A comprehensive list of these outcomes can be found in eTable 19.

For these negative control outcomes, the null hypothesis is that the exposure (i.e., elevated BMI) has no effect on these outcomes. Given the potential existence of systematic error, these negative control outcomes are used to assess the performance of our study design and contribute to calibrating our estimated effect[15, 16]. Specifically, we initially estimated the empirical null distribution of these negative control outcomes, employing the identical modified Poisson regression method.



**eTable 3.** Characteristics According to Missingness of BMI Status Prior to COVID-19 Infection<sup>a</sup>

| Characteristics                                | Missing BMI status, No (%) |                | P value <sup>b</sup> |
|------------------------------------------------|----------------------------|----------------|----------------------|
|                                                | Yes (N=67451)              | No (N=172136)  |                      |
| Mean age (SD), yr <sup>c</sup>                 | 10.07 (6.41)               | 13.06 (4.37)   | <0.001               |
| Sex                                            |                            |                |                      |
| Male                                           | 33772 (50.07)              | 81949 (47.61)  | <0.001               |
| Female                                         | 33679 (49.93)              | 90187 (52.39)  | <0.001               |
| Race                                           |                            |                |                      |
| Hispanic                                       | 15476 (22.94)              | 42982 (24.97)  | <0.001               |
| Non-Hispanic Black                             | 13475 (19.98)              | 33065 (19.21)  | <0.001               |
| Non-Hispanic White                             | 35156 (52.12)              | 87275 (50.70)  | <0.001               |
| Other <sup>d</sup>                             | 3344 (4.96)                | 8814 (5.12)    | 0.105                |
| Predominant variant                            |                            |                |                      |
| Pre-Alpha                                      | 17496 (25.94)              | 45440 (26.40)  | 0.022                |
| Alpha                                          | 3795 (5.63)                | 8555 (4.97)    | <0.001               |
| Delta                                          | 17527 (25.98)              | 42490 (24.68)  | <0.001               |
| Omicron                                        | 28633 (42.45)              | 75651 (43.95)  | <0.001               |
| PMCA                                           |                            |                |                      |
| None                                           | 58732 (87.07)              | 105294 (61.17) | <0.001               |
| Noncomplex                                     | 6304 (9.35)                | 40135 (23.32)  | <0.001               |
| Complex                                        | 2415 (3.58)                | 26707 (15.52)  | <0.001               |
| Severity                                       |                            |                |                      |
| Asymptomatic                                   | 40799 (60.49)              | 102366 (59.47) | <0.001               |
| Mild                                           | 21787 (32.30)              | 60728 (35.28)  | <0.001               |
| Moderate                                       | 3305 (4.90)                | 5704 (3.31)    | <0.001               |
| Severe                                         | 1560 (2.31)                | 3338 (1.94)    | <0.001               |
| Numbers of negative COVID-19 tests             |                            |                |                      |
| 0                                              | 43079 (63.87)              | 104312 (60.60) | <0.001               |
| 1                                              | 14719 (21.82)              | 36964 (21.47)  | 0.063                |
| ≥2                                             | 9653 (14.31)               | 30860 (17.93)  | <0.001               |
| Numbers of ED visits                           |                            |                |                      |
| 0                                              | 46010 (68.21)              | 129862 (75.44) | <0.001               |
| 1                                              | 12164 (18.03)              | 22896 (13.30)  | <0.001               |
| 2                                              | 4670 (6.92)                | 9188 (5.30)    | <0.001               |
| ≥3                                             | 4670 (6.83)                | 10260 (5.96)   | <0.001               |
| Numbers of IPD visits                          |                            |                |                      |
| 0                                              | 65195 (96.66)              | 158826 (92.27) | <0.001               |
| 1                                              | 1912 (2.83)                | 8404 (4.88)    | <0.001               |
| 2                                              | 214 (0.32)                 | 2383 (1.38)    | <0.001               |
| ≥3                                             | 130 (0.19)                 | 2523 (1.47)    | <0.001               |
| Numbers of OPD visits                          |                            |                |                      |
| 0                                              | 28339 (42.01)              | 8830 (5.13)    | <0.001               |
| 1                                              | 14479 (21.47)              | 15274 (8.87)   | <0.001               |
| 2                                              | 7976 (11.82)               | 19255 (11.19)  | <0.001               |
| ≥3                                             | 16657 (24.69)              | 128777 (74.81) | <0.001               |
| Numbers of medications or prescriptions        |                            |                |                      |
| 0                                              | 31523 (46.73)              | 28421 (16.51)  | <0.001               |
| 1                                              | 9749 (14.45)               | 19251 (11.18)  | <0.001               |
| 2                                              | 6827 (10.12)               | 17632 (10.24)  | 0.381                |
| ≥3                                             | 19352 (28.69)              | 106832 (62.06) | <0.001               |
| PASC (U09.9)                                   | 532 (0.79)                 | 1402 (0.81)    | 0.543                |
| Any occurrence of PASC symptoms                | 24232 (35.93)              | 74317 (43.17)  | <0.001               |
| Median total occurrence of PASC symptoms (IQR) | 0 (0-14)                   | 0 (0-15)       | <0.001               |

Abbreviations: BMI, body mass index; ED, Emergency department; IPD, Inpatient department; IQR, interquartile range; OPD, Outpatient department; PASC, post-acute sequelae of SARS-CoV-2 infection; PMCA, Pediatric Medical Complexity; SD, Standard deviation.

<sup>a</sup> Percentages may not total 100 because of rounding.

<sup>b</sup> Student's t test for age and total occurrence of PASC symptoms, contingency chi-square test for the other categorical variables.

<sup>c</sup> Referred to the cohort entry age.

<sup>c</sup> Other race/ethnicity included Asian American/Pacific Islander.

**eTable 4.** Incident Occurrences of PASC Symptoms and Conditions Within Follow-Up Period<sup>a</sup>

| <b>PASC symptoms and conditions</b>                            | <b>Incident count</b> | <b>Total count</b> | <b>Incidence (%)</b> |
|----------------------------------------------------------------|-----------------------|--------------------|----------------------|
| <b>Any occurrences of symptoms and conditions <sup>b</sup></b> | <b>16636</b>          | <b>63046</b>       | <b>26.387</b>        |
| Abdominal pain                                                 | 6370                  | 152662             | 4.173                |
| Abnormal liver enzymes                                         | 531                   | 170595             | 0.311                |
| Acute kidney injury                                            | 367                   | 171175             | 0.214                |
| Acute respiratory distress syndrome                            | 39                    | 172098             | 0.023                |
| Arrhythmias                                                    | 2620                  | 164984             | 1.588                |
| Cardiovascular signs and symptoms                              | 1750                  | 166377             | 1.052                |
| Changes in taste and smell                                     | 427                   | 171446             | 0.249                |
| Chest pain                                                     | 3402                  | 163905             | 2.076                |
| Cognitive function                                             | 604                   | 169881             | 0.356                |
| Fatigue and malaise                                            | 3535                  | 162370             | 2.177                |
| Fever and chills                                               | 5551                  | 156957             | 3.537                |
| Fluid and electrolyte imbalances                               | 754                   | 170036             | 0.443                |
| Generalized pain                                               | 2930                  | 163575             | 1.791                |
| Hair loss                                                      | 524                   | 170953             | 0.307                |
| headache                                                       | 5465                  | 153301             | 3.565                |
| Heart disease                                                  | 653                   | 170130             | 0.384                |
| Mental health disorders                                        | 9548                  | 128024             | 7.458                |
| musculoskeletal                                                | 7586                  | 145561             | 5.212                |
| myocarditis                                                    | 94                    | 172074             | 0.055                |
| myositis                                                       | 39                    | 172031             | 0.023                |
| POTS                                                           | 2701                  | 165174             | 1.635                |
| Respiratory signs and symptoms                                 | 10967                 | 134345             | 8.163                |
| Skin symptoms                                                  | 5110                  | 154988             | 3.297                |
| Thrombophlebitis and thromboembolism                           | 192                   | 171667             | 0.112                |

Abbreviation: PASC, post-acute sequelae of SARS-CoV-2 infection; POT, postural orthostatic tachycardia syndrome or dysautonomia.

<sup>a</sup> The incident occurrences were assessed within the follow-up period, but that did not occur during the baseline period.

<sup>b</sup> Any occurrences of symptoms and conditions was defined as any incident occurrences of the 24 PASC symptoms and conditions within the follow-up period, but that did not occur during the baseline period.

**eTable 5.** Estimated Association of BMI Status Prior to the SARS-CoV-2 Infection and Risk of PASC by Considering the Assessment Time of BMI Status <sup>ab</sup> (N=105326)

| Outcome                               | BMI Status                 | Incident/total COVID, No (%) <sup>c</sup> | RR (95% CI)                 | P for trend |
|---------------------------------------|----------------------------|-------------------------------------------|-----------------------------|-------------|
| PASC<br>(U09.9)                       | Healthy weight             | 338/42404 (0.8)                           | 1 [Reference]               | 0.01        |
|                                       | Overweight                 | 100/11049 (0.9)                           | 1.153 (0.924, 1.439)        |             |
|                                       | Obesity                    | 137/15879 (0.9)                           | <b>1.305 (1.069, 1.592)</b> |             |
|                                       | Severe obesity             | 352/35994 (1.0)                           | <b>1.403 (1.201, 1.638)</b> |             |
| PASC<br>symptoms<br>and<br>conditions | Any Occurrences            |                                           |                             | <0.001      |
|                                       | Healthy weight             | 19292/42404 (45.5)                        | 1 [Reference]               |             |
|                                       | Overweight                 | 5270/11049 (47.7)                         | 1.052 (0.987, 1.121)        |             |
|                                       | Obesity                    | 7520/15879 (47.4)                         | <b>1.109 (1.050, 1.172)</b> |             |
|                                       | Severe obesity             | 17473/35994 (48.5)                        | <b>1.171 (1.121, 1.223)</b> |             |
|                                       | Total Occurrences (median) |                                           |                             | <0.001      |
|                                       | Healthy weight             | 0                                         | 1 [Reference]               |             |
|                                       | Overweight                 | 0                                         | <b>1.099(1.025, 1.179)</b>  |             |
| Obesity                               | 0                          | <b>1.146(1.080, 1.216)</b>                |                             |             |
| Severe obesity                        | 0                          | <b>1.186 (1.132, 1.244)</b>               |                             |             |

Abbreviation: BMI, body mass index; CI, confidence interval; PASC, post-acute sequelae of SARS-CoV-2 infection; RR, relative risk.

<sup>a</sup> The BMI status was assessed within 6 months before cohort entry rather than 18 months before cohort entry.

<sup>b</sup> Adjusted for age assessed BMI and entered cohort (continuous), sex, race/ethnicity, PMCA index, predominant variant, acute COVID-19 severity, numbers of emergency department visits, outpatient department visits, inpatient department visits, medications or prescriptions, and negative COVID-19 tests.

<sup>c</sup> Incident referred to the count of participants developed the outcome we interested in, total COVID referred to the count of the participants in the corresponding group, and the value in the bracket referred to the percentage of the groups who developed the outcome we interested in.

**eTable 6.** Estimated Association of BMI Status Prior to the SARS-CoV-2 Infection and Risk of PASC by Considering the Release Time of U09.9<sup>ab</sup> (N=101143)

| Outcome                               | BMI Status                 | Incident/total COVID, No (%) <sup>c</sup> | RR (95% CI)                 | P for trend |
|---------------------------------------|----------------------------|-------------------------------------------|-----------------------------|-------------|
| PASC<br>(U09.9)                       | Healthy weight             | 427/40490 (1.1)                           | 1 [Reference]               | 0.004       |
|                                       | Overweight                 | 112/10205 (1.1)                           | 1.056 (0.860, 1.296)        |             |
|                                       | Obesity                    | 158/15335 (1.0)                           | <b>1.220 (1.017, 1.464)</b> |             |
|                                       | Severe obesity             | 451/35113 (1.3)                           | <b>1.419 (1.236, 1.629)</b> |             |
| PASC<br>symptoms<br>and<br>conditions | Any Occurrences            |                                           |                             |             |
|                                       | Healthy weight             | 17518/40490 (43.3)                        | 1 [Reference]               | <0.001      |
|                                       | Overweight                 | 4642/10205 (45.5)                         | 1.026 (0.964, 1.091)        |             |
|                                       | Obesity                    | 7086/15335 (46.2)                         | <b>1.147 (1.091, 1.207)</b> |             |
|                                       | Severe obesity             | 16659/35113 (47.4)                        | <b>1.203 (1.156, 1.253)</b> |             |
|                                       | Total Occurrences (median) |                                           |                             |             |
|                                       | Healthy weight             | 0                                         | 1 [Reference]               | <0.001      |
|                                       | Overweight                 | 0                                         | 1.051 (0.982, 1.124)        |             |
| Obesity                               | 0                          | <b>1.178 (1.115, 1.244)</b>               |                             |             |
| Severe obesity                        | 0                          | <b>1.214 (1.162, 1.268)</b>               |                             |             |

Abbreviation: BMI, body mass index; CI, confidence interval; PASC, post-acute sequelae of SARS-CoV-2 infection; RR, relative risk.

<sup>a</sup> The cohort entry date was restricted to after October 1, 2021 when the U09.9 was released.

<sup>b</sup> Adjusted for age assessed BMI and entered cohort (continuous), sex, race/ethnicity, PMCA index, predominant variant, acute COVID-19 severity, numbers of emergency department visits, outpatient department visits, inpatient department visits, medications or prescriptions, and negative COVID-19 tests.

<sup>c</sup> Incident referred to the count of participants developed the outcome we interested in, total COVID referred to the count of the participants in the corresponding group, and the value in the bracket referred to the percentage of the groups who developed the outcome we interested in.

**eTable 7.** Estimated Association of BMI Status Prior to the SARS-CoV-2 Infection and Risk of PASC by Excluding Participants Who Were Included With the Diagnosis of PASC Alone Considering the Release Time of U09.9 <sup>ab</sup> (N=100509)

| Outcome                      | BMI Status                 | Incident/total COVID, No (%) <sup>c</sup> | RR (95% CI)                 | P for trend |
|------------------------------|----------------------------|-------------------------------------------|-----------------------------|-------------|
| PASC (U09.9)                 | Healthy weight             | 182/40313 (0.5)                           | 1 [Reference]               | 0.006       |
|                              | Overweight                 | 43/10134 (0.4)                            | 1.056 (0.861, 1.295)        |             |
|                              | Obesity                    | 64/15246 (0.4)                            | <b>1.206 (1.006, 1.446)</b> |             |
|                              | Severe obesity             | 156/34816 (0.4)                           | <b>1.404 (1.223, 1.611)</b> |             |
| PASC symptoms and conditions | Any Occurrences            |                                           |                             |             |
|                              | Healthy weight             | 17353/40313 (43.0)                        | 1 [Reference]               | <0.001      |
|                              | Overweight                 | 4580/10134 (45.2)                         | 1.026 (0.964, 1.091)        |             |
|                              | Obesity                    | 7010/15246 (46.0)                         | <b>1.147 (1.090, 1.207)</b> |             |
|                              | Severe obesity             | 16413/34816 (47.1)                        | <b>1.203 (1.156, 1.253)</b> |             |
|                              | Total Occurrences (median) |                                           |                             |             |
|                              | Healthy weight             | 0                                         | 1 [Reference]               | <0.001      |
|                              | Overweight                 | 0                                         | 1.050 (0.982, 1.124)        |             |
| Obesity                      | 0                          | <b>1.177 (1.114, 1.243)</b>               |                             |             |
| Severe obesity               | 0                          | <b>1.214 (1.162, 1.268)</b>               |                             |             |

Abbreviation: BMI, body mass index; CI, confidence interval; PASC, post-acute sequelae of SARS-CoV-2 infection; RR, relative risk.

<sup>a</sup> Participants who were included with the diagnosis of PASC alone were excluded, where the entrance date was also constrained to after October 1, 2021 when the U09.9 was released.

<sup>b</sup> Adjusted for age assessed BMI and entered cohort (continuous), sex, race/ethnicity, PMCA index, predominant variant, acute COVID-19 severity, numbers of emergency department visits, outpatient department visits, inpatient department visits, medications or prescriptions, and negative COVID-19 tests.

**eTable 8.** Estimated Association of BMI Status Prior to the SARS-CoV-2 Infection and Risk of PASC After Excluding Participants Confirmed by Serology Test After November 2022 (N=171978)<sup>a</sup>

| Outcome                               | BMI Status                 | Incident/total COVID, No (%) <sup>b</sup> | RR (95% CI)                 | P for trend |
|---------------------------------------|----------------------------|-------------------------------------------|-----------------------------|-------------|
| PASC<br>(U09.9)                       | Healthy weight             | 506/68827 (0.7)                           | 1 [Reference]               | 0.001       |
|                                       | Overweight                 | 137/17585 (0.8)                           | 1.064 (0.882, 1.284)        |             |
|                                       | Obesity                    | 196/25333 (0.8)                           | <b>1.259 (1.067, 1.485)</b> |             |
|                                       | Severe obesity             | 551/60233 (0.9)                           | <b>1.437 (1.267, 1.630)</b> |             |
| PASC<br>symptoms<br>and<br>conditions | Any Occurrences            |                                           |                             |             |
|                                       | Healthy weight             | 28600/68827 (41.6)                        | 1 [Reference]               | <0.001      |
|                                       | Overweight                 | 7620/17585 (43.3)                         | 1.028 (0.981, 1.079)        |             |
|                                       | Obesity                    | 11050/25333 (43.6)                        | <b>1.108 (1.064, 1.154)</b> |             |
|                                       | Severe obesity             | 26919/60233 (44.7)                        | <b>1.177 (1.140, 1.215)</b> |             |
|                                       | Total Occurrences (median) |                                           |                             |             |
|                                       | Healthy weight             | 0                                         | 1 [Reference]               | <0.001      |
|                                       | Overweight                 | 0                                         | 1.049 (0.996, 1.104)        |             |
|                                       | Obesity                    | 0                                         | <b>1.137 (1.088, 1.188)</b> |             |
|                                       | Severe obesity             | 0                                         | <b>1.186 (1.146, 1.228)</b> |             |

Abbreviation: BMI, body mass index; CI, confidence interval; PASC, post-acute sequelae of SARS-CoV-2 infection; RR, relative risk.

<sup>a</sup> Adjusted for age assessed BMI and entered cohort (continuous), sex, race/ethnicity, PMCA index, predominant variant, acute COVID-19 severity, numbers of emergency department visits, outpatient department visits, inpatient department visits, medications or prescriptions, and negative COVID-19 tests.

<sup>b</sup> Incident referred to the count of participants developed the outcome we interested in, total COVID referred to the count of the participants in the corresponding group, and the value in the bracket referred to the percentage of the groups who developed the outcome we interested in.

**eTable 9.** Estimated Association of BMI Status Prior to the SARS-CoV-2 Infection and Risk of PASC After Excluding Severe or Moderate Participants (N=163094)<sup>a</sup>

| Outcome                      | BMI Status                 | Incident/total COVID, No (%) <sup>b</sup> | RR (95% CI)                 | P for trend |
|------------------------------|----------------------------|-------------------------------------------|-----------------------------|-------------|
| PASC (U09.9)                 | Healthy weight             | 476/64674 (0.7)                           | 1 [Reference]               | 0.001       |
|                              | Overweight                 | 131/16482 (0.8)                           | 1.085 (0.895, 1.315)        |             |
|                              | Obesity                    | 186/23837 (0.8)                           | <b>1.273 (1.074, 1.508)</b> |             |
|                              | Severe obesity             | 526/58101 (0.9)                           | <b>1.440 (1.264, 1.640)</b> |             |
| PASC symptoms and conditions | Any Occurrences            |                                           |                             |             |
|                              | Healthy weight             | 26269/64674 (40.6)                        | 1 [Reference]               | <0.001      |
|                              | Overweight                 | 6991/16482 (42.4)                         | 1.027 (0.978, 1.079)        |             |
|                              | Obesity                    | 10246/23837 (43.0)                        | <b>1.106 (1.061, 1.153)</b> |             |
|                              | Severe obesity             | 25631/58101 (44.1)                        | <b>1.175 (1.137, 1.214)</b> |             |
|                              | Total Occurrences (median) |                                           |                             |             |
|                              | Healthy weight             | 0                                         | 1 [Reference]               | <0.001      |
|                              | Overweight                 | 0                                         | 1.044 (0.990, 1.101)        |             |
| Obesity                      | 0                          | <b>1.137 (1.087, 1.190)</b>               |                             |             |
| Severe obesity               | 0                          | <b>1.184 (1.143, 1.226)</b>               |                             |             |

Abbreviation: BMI, body mass index; CI, confidence interval; PASC, post-acute sequelae of SARS-CoV-2 infection; RR, relative risk.

<sup>a</sup> Adjusted for age assessed BMI and entered cohort (continuous), sex, race/ethnicity, PMCA index, predominant variant, numbers of emergency department visits, outpatient department visits, inpatient department visits, medications or prescriptions, and negative COVID-19 tests.

<sup>b</sup> Incident referred to the count of participants developed the outcome we interested in, total COVID referred to the count of the participants in the corresponding group, and the value in the bracket referred to the percentage of the groups who developed the outcome we interested in.



**eTable 10.** Estimated Association of BMI Status Prior to the SARS-CoV-2 Infection and Risk of PASC Adjusting for Doses of COVID-19 Vaccine Before Infection (N=172316)<sup>a</sup>

| Outcome                               | BMI Status                 | Incident/total COVID, No (%) <sup>b</sup> | RR (95% CI)                 | P for trend |
|---------------------------------------|----------------------------|-------------------------------------------|-----------------------------|-------------|
| PASC<br>(U09.9)                       | Healthy weight             | 514/68918 (0.7)                           | 1 [Reference]               | 0.001       |
|                                       | Overweight                 | 137/17605 (0.8)                           | 1.046 (0.868, 1.262)        |             |
|                                       | Obesity                    | 199/25372 (0.8)                           | <b>1.251 (1.062, 1.475)</b> |             |
|                                       | Severe obesity             | 552/60241 (0.9)                           | <b>1.422 (1.254, 1.611)</b> |             |
| PASC<br>symptoms<br>and<br>conditions | Any Occurrences            |                                           |                             |             |
|                                       | Healthy weight             | 28674/68918 (41.6)                        | 1 [Reference]               | <0.001      |
|                                       | Overweight                 | 7637/17605 (43.4)                         | 1.029 (0.982, 1.079)        |             |
|                                       | Obesity                    | 11081/25372 (43.7)                        | <b>1.106 (1.062, 1.152)</b> |             |
|                                       | Severe obesity             | 26925/60241 (44.7)                        | <b>1.175 (1.138, 1.213)</b> |             |
|                                       | Total Occurrences (median) |                                           |                             |             |
|                                       | Healthy weight             | 0                                         | 1 [Reference]               | <0.001      |
|                                       | Overweight                 | 0                                         | 1.052 (0.999, 1.108)        |             |
| Obesity                               | 0                          | <b>1.134 (1.086, 1.186)</b>               |                             |             |
| Severe obesity                        | 0                          | <b>1.182 (1.142, 1.223)</b>               |                             |             |

Abbreviation: BMI, body mass index; CI, confidence interval; PASC, post-acute sequelae of SARS-CoV-2 infection; RR, relative risk.

<sup>a</sup> Adjusted for age assessed BMI and entered cohort (continuous), sex, race/ethnicity, PMCA index, predominant variant, acute COVID-19 severity, numbers of emergency department visits, outpatient department visits, inpatient department visits, medications or prescriptions, negative COVID-19 tests, and doses of COVID-19 vaccine before infection.

<sup>b</sup> Incident referred to the count of participants developed the outcome we interested in, total COVID referred to the count of the participants in the corresponding group, and the value in the bracket referred to the percentage of the groups who developed the outcome we interested in.

**eTable 11.** Estimated Association of BMI Status Prior to the SARS-CoV-2 Infection and Risk of PASC Adjusting for Interval Since Last COVID-19 Vaccination Date (N=172316)<sup>a</sup>

| Outcome                               | BMI Status                 | Incident/total COVID, No (%) <sup>b</sup> | RR (95% CI)                 | P for trend |
|---------------------------------------|----------------------------|-------------------------------------------|-----------------------------|-------------|
| PASC<br>(U09.9)                       | Healthy weight             | 514/68918 (0.7)                           | 1 [Reference]               | 0.001       |
|                                       | Overweight                 | 137/17605 (0.8)                           | 1.046 (0.867, 1.261)        |             |
|                                       | Obesity                    | 199/25372 (0.8)                           | <b>1.249 (1.060, 1.472)</b> |             |
|                                       | Severe obesity             | 552/60241 (0.9)                           | <b>1.420 (1.253, 1.610)</b> |             |
| PASC<br>symptoms<br>and<br>conditions | Any Occurrences            |                                           |                             |             |
|                                       | Healthy weight             | 28674/68918 (41.6)                        | 1 [Reference]               | <0.001      |
|                                       | Overweight                 | 7637/17605 (43.4)                         | 1.029 (0.981, 1.079)        |             |
|                                       | Obesity                    | 11081/25372 (43.7)                        | <b>1.106 (1.062, 1.152)</b> |             |
|                                       | Severe obesity             | 26925/60241 (44.7)                        | <b>1.175 (1.138, 1.213)</b> |             |
|                                       | Total Occurrences (median) |                                           |                             |             |
|                                       | Healthy weight             | 0                                         | 1 [Reference]               | <0.001      |
|                                       | Overweight                 | 0                                         | 1.052 (0.999, 1.108)        |             |
| Obesity                               | 0                          | <b>1.135 (1.086, 1.186)</b>               |                             |             |
| Severe obesity                        | 0                          | <b>1.182 (1.142, 1.223)</b>               |                             |             |

Abbreviation: BMI, body mass index; CI, confidence interval; PASC, post-acute sequelae of SARS-CoV-2 infection; RR, relative risk.

<sup>a</sup> Adjusted for age assessed BMI and entered cohort (continuous), sex, race/ethnicity, PMCA index, predominant variant, acute COVID-19 severity, numbers of emergency department visits, outpatient department visits, inpatient department visits, medications or prescriptions, negative COVID-19 tests, interval since last COVID-19 vaccination date.

<sup>b</sup> Incident referred to the count of participants developed the outcome we interested in, total COVID referred to the count of the participants in the corresponding group, and the value in the bracket referred to the percentage of the groups who developed the outcome we interested in.

**eTable 12.** Estimated Association of BMI Status Prior to the SARS-CoV-2 Infection and Risk of PASC Adjusting for Doses of COVID-19 Vaccine Before Infection and Interval Since Last COVID-19 Vaccination Date (N=172316)<sup>a</sup>

| Outcome                      | BMI Status                 | Incident/total COVID, No (%) <sup>b</sup> | RR (95% CI)                 | P for trend |
|------------------------------|----------------------------|-------------------------------------------|-----------------------------|-------------|
| PASC (U09.9)                 | Healthy weight             | 514/68918 (0.7)                           | 1 [Reference]               | 0.001       |
|                              | Overweight                 | 137/17605 (0.8)                           | 1.046 (0.867, 1.262)        |             |
|                              | Obesity                    | 199/25372 (0.8)                           | <b>1.251 (1.062, 1.475)</b> |             |
|                              | Severe obesity             | 552/60241 (0.9)                           | <b>1.422 (1.254, 1.611)</b> |             |
| PASC symptoms and conditions | Any Occurrences            |                                           |                             |             |
|                              | Healthy weight             | 28674/68918 (41.6)                        | 1 [Reference]               | <0.001      |
|                              | Overweight                 | 7637/17605 (43.4)                         | 1.029 (0.982, 1.079)        |             |
|                              | Obesity                    | 11081/25372 (43.7)                        | <b>1.106 (1.062, 1.152)</b> |             |
|                              | Severe obesity             | 26925/60241 (44.7)                        | <b>1.175 (1.138, 1.213)</b> |             |
|                              | Total Occurrences (median) |                                           |                             |             |
|                              | Healthy weight             | 0                                         | 1 [Reference]               | <0.001      |
|                              | Overweight                 | 0                                         | 1.052 (0.999, 1.108)        |             |
| Obesity                      | 0                          | <b>1.135 (1.086, 1.186)</b>               |                             |             |
| Severe obesity               | 0                          | <b>1.182 (1.142, 1.223)</b>               |                             |             |

Abbreviation: BMI, body mass index; CI, confidence interval; PASC, post-acute sequelae of SARS-CoV-2 infection; RR, relative risk.

<sup>a</sup> Adjusted for age assessed BMI and entered cohort (continuous), sex, race/ethnicity, PMCA index, predominant variant, acute COVID-19 severity, numbers of emergency department visits, outpatient department visits, inpatient department visits, medications or prescriptions, negative COVID-19 tests, doses of COVID-19 vaccine before infection and interval since last COVID-19 vaccination date.

<sup>b</sup> Incident referred to the count of participants developed the outcome we interested in, total COVID referred to the count of the participants in the corresponding group, and the value in the bracket referred to the percentage of the groups who developed the outcome we interested in.

**eTable 13.** Estimated Association of BMI Status Prior to the SARS-CoV-2 Infection and Risk of PASC Adjusting Type of Insurance (N=140036)<sup>a</sup>

| Outcome                               | BMI Status                 | Incident/total COVID, No (%) <sup>b</sup> | RR (95% CI)                 | P for trend |
|---------------------------------------|----------------------------|-------------------------------------------|-----------------------------|-------------|
| PASC<br>(U09.9)                       | Healthy weight             | 396/54114 (0.7)                           | 1 [Reference]               | 0.002       |
|                                       | Overweight                 | 117/14233 (0.8)                           | 1.161 (0.946, 1.426)        |             |
|                                       | Obesity                    | 166/21047 (0.8)                           | <b>1.372 (1.142, 1.649)</b> |             |
|                                       | Severe obesity             | 460/50642 (0.9)                           | <b>1.575 (1.339, 1.851)</b> |             |
| PASC<br>symptoms<br>and<br>conditions | Any Occurrences            |                                           |                             |             |
|                                       | Healthy weight             | 22624/54114 (41.8)                        | 1 [Reference]               | <0.001      |
|                                       | Overweight                 | 6197/14233 (43.5)                         | 1.018 (0.965, 1.075)        |             |
|                                       | Obesity                    | 9037/21047 (42.9)                         | <b>1.056 (1.008, 1.106)</b> |             |
|                                       | Severe obesity             | 22482/50642 (44.4)                        | <b>1.064 (1.021, 1.109)</b> |             |
|                                       | Total Occurrences (median) |                                           |                             |             |
|                                       | Healthy weight             | 0                                         | 1 [Reference]               | <0.001      |
|                                       | Overweight                 | 0                                         | 1.031 (0.972, 1.094)        |             |
| Obesity                               | 0                          | <b>1.072 (1.019, 1.127)</b>               |                             |             |
| Severe obesity                        | 0                          | <b>1.066 (1.019, 1.115)</b>               |                             |             |

Abbreviation: BMI, body mass index; CI, confidence interval; PASC, post-acute sequelae of SARS-CoV-2 infection; RR, relative risk.

<sup>a</sup> Adjusted for age assessed BMI and entered cohort (continuous), sex, race/ethnicity, PMCA index, predominant variant, acute COVID-19 severity, numbers of emergency department visits, outpatient department visits, inpatient department visits, medications or prescriptions, negative COVID-19 tests, and type of insurance.

<sup>b</sup> Incident referred to the count of participants developed the outcome we interested in, total COVID referred to the count of the participants in the corresponding group, and the value in the bracket referred to the percentage of the groups who developed the outcome we interested in.

**eTable 14.** Estimated Association of BMI Status Prior to the SARS-CoV-2 Infection and Risk of PASC Account for the Clustering by Sites (N=172136)<sup>a</sup>

| Outcome                      | BMI Status                 | Incident/total COVID, No (%) <sup>b</sup> | RR (95% CI)                 | P for trend |  |
|------------------------------|----------------------------|-------------------------------------------|-----------------------------|-------------|--|
| PASC (U09.9)                 | Healthy weight             | 514/68918 (0.7)                           | 1 [Reference]               | <0.001      |  |
|                              | Overweight                 | 137/17605 (0.8)                           | 1.047 (0.868, 1.262)        |             |  |
|                              | Obesity                    | 199/25372 (0.8)                           | 1.136 (0.960, 1.345)        |             |  |
|                              | Severe obesity             | 552/60241 (0.9)                           | 1.101 (0.925, 1.312)        |             |  |
| PASC symptoms and conditions | Any Occurrences            |                                           |                             |             |  |
|                              | Healthy weight             | 28674/68918 (41.6)                        | 1 [Reference]               | <0.001      |  |
|                              | Overweight                 | 7637/17605 (43.4)                         | 1.022 (0.975, 1.071)        |             |  |
|                              | Obesity                    | 11081/25372 (43.7)                        | <b>1.057 (1.014, 1.103)</b> |             |  |
|                              | Severe obesity             | 26925/60241 (44.7)                        | <b>1.071 (1.022, 1.123)</b> |             |  |
|                              | Total Occurrences (median) |                                           |                             |             |  |
|                              | Healthy weight             | 0                                         | 1 [Reference]               | <0.001      |  |
|                              | Overweight                 | 0                                         | <b>1.041 (0.989, 1.096)</b> |             |  |
| Obesity                      | 0                          | <b>1.084 (1.036, 1.135)</b>               |                             |             |  |
| Severe obesity               | 0                          | <b>1.082 (1.028, 1.138)</b>               |                             |             |  |

Abbreviation: BMI, body mass index; CI, confidence interval; PASC, post-acute sequelae of SARS-CoV-2 infection; RR, relative risk.

<sup>a</sup> Adjusted for age assessed BMI and entered cohort (continuous), sex, race/ethnicity, PMCA index, predominant variant, acute COVID-19 severity, numbers of emergency department visits, outpatient department, inpatient department, medications or prescriptions, negative COVID-19 tests, and site index.

<sup>b</sup> Incident referred to the count of participants developed the outcome we interested in, total COVID referred to the count of the participants in the corresponding group, and the value in the bracket referred to the percentage of the groups who developed the outcome we interested in.

**eTable 15.** Estimated Association of BMI Status Prior to the SARS-CoV-2 Infection and Risk of PASC After Excluding Participants With Diabetes (N=169495)<sup>a</sup>

| Outcome                               | BMI Status                 | Incident/total COVID, No (%) <sup>b</sup> | RR (95% CI)                 | P for trend |  |
|---------------------------------------|----------------------------|-------------------------------------------|-----------------------------|-------------|--|
| PASC<br>(U09.9)                       | Healthy weight             | 508/67978 (0.7)                           | 1 [Reference]               | 0.001       |  |
|                                       | Overweight                 | 136/17244 (0.8)                           | 1.058 (0.876, 1.276)        |             |  |
|                                       | Obesity                    | 196/24951 (0.8)                           | <b>1.258 (1.066, 1.484)</b> |             |  |
|                                       | Severe obesity             | 548/59322 (0.9)                           | <b>1.433 (1.263, 1.626)</b> |             |  |
| PASC<br>symptoms<br>and<br>conditions | Any Occurrences            |                                           |                             |             |  |
|                                       | Healthy weight             | 28302/67978 (41.6)                        | 1 [Reference]               | <0.001      |  |
|                                       | Overweight                 | 7487/17244 (43.4)                         | 1.032 (0.984, 1.083)        |             |  |
|                                       | Obesity                    | 11894/24951 (43.7)                        | <b>1.111 (1.067, 1.157)</b> |             |  |
|                                       | Severe obesity             | 26486/59322 (44.6)                        | <b>1.178 (1.141, 1.217)</b> |             |  |
|                                       | Total Occurrences (median) |                                           |                             |             |  |
|                                       | Healthy weight             | 0                                         | 1 [Reference]               | <0.001      |  |
|                                       | Overweight                 | 0                                         | 1.052 (0.999, 1.108)        |             |  |
| Obesity                               | 0                          | <b>1.138 (1.089, 1.189)</b>               |                             |             |  |
| Severe obesity                        | 0                          | <b>1.186 (1.146, 1.228)</b>               |                             |             |  |

Abbreviation: BMI, body mass index; CI, confidence interval; PASC, post-acute sequelae of SARS-CoV-2 infection; RR, relative risk.

<sup>a</sup> Adjusted for age assessed BMI and entered cohort (continuous), sex, race/ethnicity, PMCA index, predominant variant, acute COVID-19 severity, numbers of emergency department visits, outpatient department visits, inpatient department visits, medications or prescriptions, and negative COVID-19 tests

<sup>b</sup> Incident referred to the count of participants developed the outcome we interested in, total COVID referred to the count of the participants in the corresponding group, and the value in the bracket referred to the percentage of the groups who developed the outcome we interested in.

**eTable 16.** Estimated Association of BMI Status Prior to the SARS-CoV-2 Infection and Risk of PASC After Excluding Obese Participants Taking Weight-Loss Drugs (N=169255)<sup>ab</sup>

| Outcome                               | BMI Status                 | Incident/total COVID, No (%) <sup>c</sup> | RR (95% CI)                 | P for trend |
|---------------------------------------|----------------------------|-------------------------------------------|-----------------------------|-------------|
| PASC<br>(U09.9)                       | Healthy weight             | 514/68918 (0.7)                           | 1 [Reference]               | 0.002       |
|                                       | Overweight                 | 137/17605 (0.8)                           | 1.046 (0.867, 1.261)        |             |
|                                       | Obesity                    | 189/24432 (0.8)                           | <b>1.256 (1.062, 1.485)</b> |             |
|                                       | Severe obesity             | 531/58300 (0.9)                           | <b>1.429 (1.259, 1.623)</b> |             |
| Any Occurrences                       |                            |                                           |                             |             |
| PASC<br>symptoms<br>and<br>conditions | Healthy weight             | 28674/68918 (41.6)                        | 1 [Reference]               | <0.001      |
|                                       | Overweight                 | 7637/17605 (43.4)                         | 1.030 (0.982, 1.080)        |             |
|                                       | Obesity                    | 10543/24432 (43.2)                        | <b>1.115 (1.070, 1.161)</b> |             |
|                                       | Severe obesity             | 25800/58300 (44.3)                        | <b>1.184 (1.146, 1.222)</b> |             |
|                                       | Total Occurrences (median) |                                           |                             |             |
| Healthy weight                        | 0                          | 1 [Reference]                             | <0.001                      |             |
| Overweight                            | 0                          | <b>1.053 (1.000, 1.109)</b>               |                             |             |
| Obesity                               | 0                          | <b>1.140 (1.091, 1.192)</b>               |                             |             |
| Severe obesity                        | 0                          | <b>1.192 (1.151, 1.234)</b>               |                             |             |

Abbreviation: BMI, body mass index; CI, confidence interval; PASC, post-acute sequelae of SARS-CoV-2 infection; RR, relative risk.

<sup>a</sup> Weight-loss drugs included Metformin, Orlistat, Liraglutide, Exenatide, Dulaglutide, Semaglutide, Setmelanotide, Phentermine Topiramate.

<sup>b</sup> Adjusted for age assessed BMI and entered cohort (continuous), sex, race/ethnicity, PMCA index, predominant variant, acute COVID-19 severity, numbers of emergency department visits, outpatient department visits, inpatient department visits, medications or prescriptions, and negative COVID-19 tests.

<sup>c</sup> Incident referred to the count of participants developed the outcome we interested in, total COVID referred to the count of the participants in the corresponding group, and the value in the bracket referred to the percentage of the groups who developed the outcome we interested in.

**eTable 17.** Estimated Association of BMI Status Prior to the SARS-CoV-2 Infection and Risk of PASC Based on Primary Care Sites (N=42470) <sup>a</sup>

| Outcome                               | BMI Status                 | Incident/total COVID, No (%) <sup>b</sup> | RR (95% CI)                 | P for trend |
|---------------------------------------|----------------------------|-------------------------------------------|-----------------------------|-------------|
| PASC<br>(U09.9)                       | Healthy weight             | 172/25890 (0.7)                           | 1 [Reference]               | 0.043       |
|                                       | Overweight                 | 54/7083 (0.8)                             | 1.175 (0.869, 1.590)        |             |
|                                       | Obesity                    | 63/7674 (0.8)                             | <b>1.450 (1.082, 1.944)</b> |             |
|                                       | Severe obesity             | 18/1823 (1.0)                             | 1.137 (0.699, 1.848)        |             |
| PASC<br>symptoms<br>and<br>conditions | Any Occurrences            |                                           |                             |             |
|                                       | Healthy weight             | 9335/25890 (36.1)                         | 1 [Reference]               | <0.001      |
|                                       | Overweight                 | 2684/7083 (37.9)                          | 1.057 (0.978, 1.141)        |             |
|                                       | Obesity                    | 3010/7674 (39.2)                          | <b>1.080 (1.002, 1.164)</b> |             |
|                                       | Severe obesity             | 817/1823 (44.8)                           | <b>1.106 (0.942, 1.299)</b> |             |
|                                       | Total Occurrences (median) |                                           |                             |             |
|                                       | Healthy weight             | 0                                         | 1 [Reference]               | <0.001      |
|                                       | Overweight                 | 0                                         | <b>1.102 (1.013, 1.198)</b> |             |
| Obesity                               | 0                          | <b>1.118 (1.029, 1.213)</b>               |                             |             |
| Severe obesity                        | 0                          | 1.169 (0.981, 1.392)                      |                             |             |

Abbreviation: BMI, body mass index; CI, confidence interval; PASC, post-acute sequelae of SARS-CoV-2 infection; RR, relative risk.

<sup>a</sup> Adjusted for age assessed BMI and entered cohort (continuous), sex, race/ethnicity, PMCA index, predominant variant, acute COVID-19 severity, numbers of emergency department visits, outpatient department visits, inpatient department visits, medications or prescriptions, and negative COVID-19 tests.

<sup>b</sup> Incident referred to the count of participants developed the outcome we interested in, total COVID referred to the count of the participants in the corresponding group, and the value in the bracket referred to the percentage of the groups who developed the outcome we interested in.



**eTable 18.** Estimated Association of BMI Status Prior to the SARS-CoV-2 Infection and Risk of Foreign Body in Ear as a Negative Control Outcome (N=172316)<sup>a</sup>

| <b>BMI Status</b> | <b>Incident/total COVID (%), No (%)<sup>b</sup></b> | <b>RR (95% CI)</b>   | <b>P for trend</b> |
|-------------------|-----------------------------------------------------|----------------------|--------------------|
| Healthy weight    | 6/68918 (0.0)                                       | 1 [Reference]        |                    |
| Overweight        | 4/17605 (0.0)                                       | 2.617 (0.705, 9.706) | 0.852              |
| Obesity           | 3/25372 (0.0)                                       | 0.942 (0.245, 3.622) |                    |
| Severe obesity    | 5/60241 (0.0)                                       | 0.790 (0.246, 2.536) |                    |

Abbreviation: BMI, body mass index; CI, confidence interval; RR, relative risk.

<sup>a</sup> Adjusted for age assessed BMI and entered cohort (continuous), sex, race/ethnicity, PMCA index, predominant variant, acute COVID-19 severity, numbers of emergency department visits, outpatient department visits, inpatient department visits, medications or prescriptions, and negative COVID-19 tests.

<sup>b</sup> Incident referred to the count of participants developed the outcome we interested in, total COVID referred to the count of the participants in the corresponding group, and the value in the bracket referred to the percentage of the groups who developed the outcome we interested in.

**eTable 19. Negative control outcomes**

| <b>Health conditions</b>                |
|-----------------------------------------|
| Wax in ear/impacted cerumen             |
| Snoring/Obstructive sleep apnea         |
| Contact dermatitis                      |
| Injury of head                          |
| Diaper rash                             |
| Seizure                                 |
| Speech delay                            |
| Autism/Autistic disorder                |
| Displacements - bone                    |
| Closed fracture of distal end of radius |
| Acne                                    |
| Falls                                   |
| Visual testing abnormal                 |
| Sprain of ankle                         |
| Concussion                              |
| Impetigo                                |
| Scoliosis                               |
| Foot pain                               |
| Injury of free lower limb               |
| Injury of. Upper extremity              |
| Speech dysfunction                      |
| Umbilical hernia                        |
| Insect bite                             |
| Myopia                                  |
| Injury of finger                        |
| Injury of right leg                     |
| Astigmatism                             |
| Injury of left leg                      |
| Tinea capitis                           |
| Obesity                                 |
| Injury of right hand                    |
| Tinea corporis                          |
| Epilepsy                                |
| Tongue tie                              |
| Plagiocephaly                           |
| Inguinal hernia                         |
| Pain in wrist                           |
| Closed injury of head                   |
| Foreign body in ear                     |

---

Injury of right foot

---

## eReferences

- [1] Jensen PB, Jensen LJ, Brunak S. Mining electronic health records: towards better research applications and clinical care. *Nat Rev Genet.* 2012 May 2;13(6):395-405.
- [2] Weiskopf NG, Weng C. Methods and dimensions of electronic health record data quality assessment: enabling reuse for clinical research. *J Am Med Inform Assoc.* 2013 Jan 1;20(1):144-51.
- [3] Casey JA, Schwartz BS, Stewart WF, Adler NE. Using Electronic Health Records for Population Health Research: A Review of Methods and Applications. *Annu Rev Public Health.* 2016;37:61-81.
- [4] RECOVER. Homepage. August 22, 2024. Accessed August 24, 2023. <https://recovercovid.org/>
- [5] Pfaff ER, Girvin AT, Bennett TD, et al; N3C Consortium. Identifying who has long COVID in the USA: a machine learning approach using N3C data. *Lancet Digit Health.* 2022 Jul;4(7):e532-e541.
- [6] All of Us Research Program Investigators; Denny JC, Rutter JL, Goldstein DB, et al. The "All of Us" Research Program. *N Engl J Med.* 2019 Aug 15;381(7):668-676.
- [7] Hardin AP, Hackell JM; COMMITTEE ON PRACTICE AND AMBULATORY MEDICINE. Age Limit of Pediatrics. *Pediatrics.* 2017 Sep;140(3):e20172151.
- [8] Zou G. A modified poisson regression approach to prospective studies with binary data. *Am J Epidemiol.* 2004 Apr 1;159(7):702-6.
- [9] Zou GY, Donner A. Extension of the modified Poisson regression model to prospective studies with correlated binary data. *Stat Methods Med Res.* 2013 Dec;22(6):661-70.
- [10] Greenland S. Model-based estimation of relative risks and other epidemiologic measures in studies of common outcomes and in case-control studies. *Am J Epidemiol.* 2004 Aug 15;160(4):301-5.
- [11] Yelland LN, Salter AB, Ryan P. Performance of the modified Poisson regression approach for estimating relative risks from clustered prospective data. *Am J Epidemiol.* 2011 Oct 15;174(8):984-92.
- [12] Chen W, Qian L, Shi J, Franklin M. Comparing performance between log-binomial and robust Poisson regression models for estimating risk ratios under model misspecification. *BMC Med Res Methodol.* 2018 Jun 22;18(1):63.
- [13] Keppel, G., & Wickens, T. D. *Design and analysis: A researcher's handbook* (4th ed.). Pearson Prentice Hall; 2004.
- [14] Maxwell, S. E., & Delaney, H. D. *Designing experiments and analyzing data: A model comparison perspective* (2nd ed.). Lawrence Erlbaum Associates; 2004.
- [15] Schuemie MJ, Hripcsak G, Ryan PB, Madigan D, Suchard MA. Empirical confidence interval calibration for population-level effect estimation studies in observational healthcare data. *Proceedings of the National Academy of Sciences.* 2018;115(11):2571–7.
- [16] Schuemie MJ, Ryan PB, DuMouchel W, Suchard MA, Madigan D. Interpreting observational studies: why empirical calibration is needed to correct p-values. *Stat Med.* 2014;33(2):209–18.
