# Supplementary material for: Body Mass Index and Postacute Sequelae of SARS-CoV-2 Infection in Children and Young Adults
Source: PubMed Central journal article supplement (PMC11581483; doi:10.1001/jamanetworkopen.2024.41970), 2024-10-28
Supplement: jamanetwopen-e2441970-s002.pdf [file jamanetwopen-e2441970-s002.pdf]

## Data Sharing Statement

Zhou. Body Mass Index and Postacute Sequelae of SARS-CoV-2 Infection in Children and Young Adults. *JAMA Netw Open*. Published October 28, 2024.

doi:10.1001/jamanetworkopen.2024.41970

### Data

**Data available:** No

### Additional Information

**Explanation for why data not available:** The study is based on a national multi-site cohort study with electronic health records (EHR) data. The request to the data access can be submitted via <https://recovercovid.org/>.
